# Supplementary material
Source: ML conference proceedings conference paper supplement (https://openaccess.thecvf.com/content/ICCV_2019/html/Nguyen_Anomaly_Detection_in_ICCV_2019_paper.html)
Supplement: Supplementary file 2 [file Nguyen_Anomaly_Detection_in_ICCV_2019_supplemental.zip]

Archive with 2 entries (2 files):
- Anomaly_detection_supp.pdf
- Anomaly_detection_supp.mp4
